# Supplementary material
Source: Springer Nature journal article supplement (https://www.springermedizin.de/resource/supplementary/12874_2012_934_MOESM1_ESM.pdf/9433146)

a

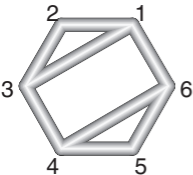

b

|     | 1:2 | 1:3 | 1:6 | 2:3 | 3:4 | 4:5 | 4:6 | 5:6 |
|-----|-----|-----|-----|-----|-----|-----|-----|-----|
| 1:2 | 63  | 27  | 10  | -37 | -10 | -3  | -7  | -3  |
| 1:3 | 27  | 53  | 20  | 27  | -20 | -7  | -13 | -7  |
| 1:6 | 10  | 20  | 70  | 10  | 30  | 10  | 20  | 10  |
| 2:3 | -37 | 27  | 10  | 63  | -10 | -3  | -7  | -3  |
| 3:4 | -10 | -20 | 30  | -10 | 70  | -10 | -20 | -10 |
| 4:5 | -3  | -7  | 10  | -3  | -10 | 63  | 27  | -37 |
| 4:6 | -7  | -13 | 20  | -7  | -20 | 27  | 53  | 27  |
| 5:6 | -3  | -7  | 10  | -3  | -10 | -37 | 27  | 63  |

Supplement: MOESM1 [file 9433146]
